# Supplementary material for: Endogenous Multiple Exon Skipping and Back-Splicing at the DMD Mutation Hotspot
Source: Int J Mol Sci. 2016 Oct 13;17(10):1722. doi: 10.3390/ijms17101722 (PMC5085753; doi:10.3390/ijms17101722)
Supplement: Supplementary file 1 [file ijms-17-01722-s001.zip › Supplementary file 2.xlsx]

## Sheet: Sheet1
SupplementalTable S1. PCR primers
Primer name		nested (outer: 1st, inner: 2nd)	Primer sequence	anneal
DMDe39fw	multiexon skipping	outer	gatgagagaaagcgagaggaaa	60˚c
DMDe612rv		outer	ctggacagacgtggaaagaaa	60˚c
DMDe41fw		inner	aactcagatccagctcagcaa	60˚c
DMDe61rv		inner	gctggaccaaagtccctgt	60˚c
DMDe43fw		inner	gaagctctctcccagcttgat	60˚c
DMDe60rv		inner	atgcccaaagtggtaagctg	60˚c
DMDe45fw		inner	aaaaattgggaagcctgaatct	60˚c
DMDe58rv		inner	cttccaaaggctgctctgtc	60˚c
DMDe47s		inner	aagctcaagcagacaaatctcc	60˚c
DMDe60s1	by-product circRNA/lariat	outer	aagtcaaggcacttcgagga	60˚c
DMDe42as1		outer	tccaaaggcatgtcttcagtc	60˚c
DMDe60s2		inner	attgcgcctctgaaagagaa	60˚c
DMDe42as2		inner	tcatcgtttcttcacggaca	60˚c
DMDe45as1		outer	actggcatctgtttttgaggat	60˚c
DMDe45as2		inner	tttcttccccagttgcattc	60˚c
DMDe59s1		outer	agatgagacccttgaaagactcc	60˚c
DMDe59s2		inner	caagaggccacggatgag	60˚c
DMDe48as1		outer	caagctgcccaaggtcttt	60˚c
DMDe48as2		inner	tgtttctcaggtaaagctctgga	60˚c
DMDe50as1		outer	ttgccctcagctcttgaagt	60˚c
DMDe50as2		inner	ttccactcagagctcagatcttc	60˚c
DMDe55s1		outer	aggctgctttggaagaaactc	60˚c
DMDe55s2		inner	cccctggacctggaaaag	60˚c
DMDe57s1		outer	tttggaagccagttctgacc	60˚c
DMDe57s2		inner	gaagcgtctgcacctttctc	60˚c
DMDe41fw	full-length mRNA	outer	aactcagatccagctcagcaa	60˚c
DMDe43fw		inner	gaagctctctcccagcttgat	60˚c
DMDe45as1		outer	actggcatctgtttttgaggat	60˚c
DMDe45as2		inner	tttcttccccagttgcattc	60˚c
DMDe40as70	e40	inner	cctgcctcttgtactgataccac	60˚c
DMDe40as105		outer	ttcaatgtcatccaagcatttc	60˚c
DMDe40s107		outer	aaaaattagccagcctacctga	60˚c
DMDe40s129		inner	gcccagagatgaaaggaaaata	60˚c
DMDe41as21	e41	inner	ctgcaattcccgatcaattt	60˚c
DMDe41as46		outer	ctgcattcagctcctctttctt	60˚c
DMDe41s102		outer	aactcagatccagctcagcaa	60˚c
DMDe41s156		inner	gtttcgaagactcaactttgcac	60˚c
DMDe42as25	e42	inner	tcatcgtttcttcacggaca	60˚c
DMDe42as53		outer	tccaaaggcatgtcttcagtc	60˚c
DMDe42s90		outer	cactcatgtctcacaagcccta	60˚c
DMDe42s134		inner	atgctcctgacctctgtgct	60˚c
DMDe43as45	e43	inner	aatgtcaatccgacctgagc	60˚c
DMDe43as76		outer	tttgcaatgctgctgtcttc	60˚c
DMDe43s115		outer	ctctcccagcttgatttcca	60˚c
DMDe43s152		inner	aaatgtacaaggaccgacaagg	60˚c
DMDe44as32	e44	inner	gccgccatttctcaacag	60˚c
DMDe44as82		outer	ttcagcttctgttagccactga	60˚c
DMDe44s90		outer	tcagaaagacacaaattcctgaga	60˚c
DMDe44s115		inner	ttgggaacatgctaaatacaaatg	60˚c
DMDe45as67	e45	inner	tttcttccccagttgcattc	60˚c
DMDe45as99		outer	actggcatctgtttttgagga	60˚c
DMDe45s116		outer	tgggaagcctgaatctgc	60˚c
DMDe45s138		inner	gcaggaggtctgcaaacagc	60˚c
DMDe46as50	e46	inner	catttaaatctctttgaaattctgaca	60˚c
DMDe46as77		outer	ctgcttcctccaaccataaaac	60˚c
DMDe46s89		outer	agtatcccacttgaacctggaa	60˚c
DMDe46s123		inner	taaaagaaaagcttgagcaagtca	60˚c
DMDe47as21	e47	inner	gggcaactcttccaccagta	60˚c
DMDe47as67		outer	cgggtcctccagtttcatt	60˚c
DMDe47s83		outer	ccataagcccagaagagcaa	60˚c
DMDe47s117		inner	taagctcaagcagacaaatctcc	60˚c
DMDe48as23	e48	inner	ttgtttctcaggtaaagctctgg	60˚c
DMDe48as71		outer	ttttcaagctgcccaagg	60˚c
DMDe48s107		outer	tgctgctgtggttatctcctatt	60˚c
DMDe48s152		inner	accaaccaaaccaagaaggac	60˚c
DMDe49as32	e49	inner	ggttgtttagcttgaactgctattt	60˚c
DMDe49as57		outer	tttagacaaaatctcttccacatcc	60˚c
DMDe49s60		outer	gcagcatttgtacaaggaaaaac	60˚c
DMDe49s83		inner	cagccactcagccagtga	60˚c
DMDe50as26	e50	inner	tcagagctcagatcttctaacttcc	60˚c
DMDe50as47		outer	aaacggtttaccgccttcc	60˚c
DMDe50s55		outer	gagctgagggcaaagcag	60˚c
DMDe50s76		inner	gacctagctcctggactgacc	60˚c
DMDe51as38	e51	inner	cacaggttgtgtcaccagagtaa	60˚c
DMDe51as76		outer	ggcatttctagtttggagatgg	60˚c
DMDe51s134		outer	acttaccgactggctttctctg	60˚c
DMDe51s179		inner	gagggtgatggtgggtga	60˚c
DMDe52as24	e52	inner	ctgttccaaatcctgcattgt	60˚c
DMDe52as57		outer	agcggtaatgagttcttccaact	60˚c
DMDe52s58		outer	gcccaaaatttgaaaaacaaga	60˚c
DMDe52s89		inner	aagaggctagaacaatcattacgg	60˚c
DMDe53as56	e53	inner	cctccggttctgaaggtgt	60˚c
DMDe53as102		outer	cttccagccattgtgttgaat	60˚c
DMDe53s154		outer	catggaaggagggtccctat	60˚c
DMDe53s182		inner	tgcaatccaaaagaaaatcaca	60˚c
DMDe54as26	e54	inner	cactggcggaggtctttg	60˚c
DMDe54as63		outer	cagggccaagtcatttgc	60˚c
DMDe54s85		outer	gcagatgataccagaaaagtcca	60˚c
DMDe54s130		inner	gcctcttggagaagcattca	60˚c
DMDe55as33	e55	inner	gtttcttccaaagcagcctct	60˚c
DMDe55as96		outer	gcttctgtaagccaggcaag	60˚c
DMDe55s122		outer	gatgctacccgtaaggaaagg	60˚c
DMDe55s157		inner	caagggagtaaaagagctgatga	60˚c
DMDe56as26	e56	inner	tgagcttcaatttcaccttgg	60˚c
DMDe56as66		outer	tttttggctgttttcatccag	60˚c
DMDe56s82		outer	gaaggttccgatgatgcagt	60˚c
DMDe56s138		inner	gtggagtgaacttcggaaaaag	60˚c
DMDe57as37	e57	inner	acgcttccactggtcagaac	60˚c
DMDe57as79		outer	cagctgtagccacaccagaa	60˚c
DMDe57s108		outer	ctattggaggcgactttcca	60˚c
DMDe57s128		inner	gcagttcagaagcagaacgat	60˚c
DMDe58as29	e58	inner	tctttagttttcaattccctcttga	60˚c
DMDe58as75		outer	tgtcagaaatattcgtacagtctcaag	60˚c
DMDe58s79		outer	gagcagcctttggaaggac	60˚c
DMDe58s100		inner	aaactctaccaggagcccaga	60˚c
DMDe59as51	e59	inner	gctttcgtagaagccgagtg	60˚c
DMDe59as99		outer	cggagtgcaggttcaatttt	60˚c
DMDe59s134		outer	aagactccgggaacttcaaga	60˚c
DMDe59s223		inner	gcgatctcctcattgactctct	60˚c
DMDe60as35	e60	inner	ttctctttcagaggcgcaat	60˚c
DMDe60as56		outer	aggtcattgacgtggctca	60˚c
DMDe60s76		outer	ttgggcattcagctctcac	60˚c
DMDe60s102		inner	cctcagcactctggaagacc	60˚c
